# Supplementary material for: Drivers of ESBL-producing Escherichia coli dynamics in calf fattening farms: A modelling study
Source: PubMed Central journal article supplement (PMC8022845; doi:10.1016/j.onehlt.2021.100238), 2021-03-18
Supplement: mmc1.pdf [file mmc1.pdf]

## Supplementary material

### Drivers of ESBL-producing *Escherichia coli* dynamics in calf fattening farms: a modelling study

J. Bastard, M. Haenni, E. Gay, P. Glaser, J.Y. Madec, L. Temime, L. Opatowski

#### SM1. Longitudinal data of ESBL-EC carriage in calves

*Table S1. ESBL-EC carriage across time in calves. The last sampling day was day 161 in farms A and B, and day 147 in farm C. ESBL-EC positive (resp. negative) samples are represented as 1 (resp. 0).*

| Farm | Pen | Calf | Sampling days |    |    |    |    |    |    |     |     |     |     |     |
|------|-----|------|---------------|----|----|----|----|----|----|-----|-----|-----|-----|-----|
|      |     |      | 7             | 21 | 35 | 49 | 63 | 77 | 91 | 106 | 119 | 133 | 147 | 161 |
| A    | A-1 | 1    | 1             | 1  | 1  | 1  | 1  | 0  | 0  | 0   | 0   | 0   | 0   | 0   |
| A    | A-1 | 2    | 1             | 1  | 1  | 1  | 0  | 0  | 0  | 0   | 0   | 0   | 0   | 0   |
| A    | A-1 | 3    | 1             | 1  | 1  | 1  | 1  | 1  | 0  | 0   | 0   | 0   | 0   | 1   |
| A    | A-1 | 4    | 1             | 1  | 1  | 1  | 1  | 0  | 0  | 0   | 0   | 0   | 0   | 0   |
| A    | A-1 | 5    | 1             | 1  | 1  | 1  | 0  | 0  | 0  | 0   | 0   | 0   | 0   | 0   |
| A    | A-2 | 6    | 1             | 1  | 1  | 1  | 1  | 0  | 0  | 0   | 0   | 0   | 0   | 0   |
| A    | A-2 | 7    | 1             | 1  | 1  | 1  | 1  | 0  | 0  | 0   | 0   | 0   | 0   | 0   |
| A    | A-2 | 8    | 1             | 1  | 1  | 1  | 1  | 1  | 0  | 0   | 0   | 0   | 0   | 0   |
| A    | A-2 | 9    | 1             | 1  | 1  | 1  | 1  | 0  | 0  | 0   | 0   | 0   | 0   | 0   |
| A    | A-2 | 10   | 1             | 1  | 1  | 1  | 1  | 1  | 0  | 0   | 0   | 0   | 0   | 0   |
| A    | A-3 | 11   | 1             | 1  | 1  | 1  | 1  | 1  | 0  | 0   | 1   | 0   | 1   | 0   |
| A    | A-3 | 12   | 1             | 1  | 1  | 1  | 1  | 0  | 0  | 0   | 0   | 0   | 0   | 0   |
| A    | A-3 | 13   | 1             | 1  | 1  | 1  | 1  | 1  | 1  | 0   | 0   | 0   | 1   | 0   |
| A    | A-3 | 14   | 1             | 1  | 1  | 1  | 1  | 0  | 0  | 0   | 0   | 0   | 0   | 0   |
| A    | A-3 | 15   | 1             | 1  | 1  | 1  | 1  | 1  | 0  | 0   | 0   | 0   | 0   | 0   |
| B    | B-1 | 16   | 0             | 0  | 0  | 0  | 0  | 0  | 0  | 0   | 0   | 0   | 0   | 0   |
| B    | B-1 | 17   | 0             | 0  | 0  | 0  | 0  | 0  | 0  | 0   | 0   | 0   | 0   | 0   |
| B    | B-1 | 18   | 0             | 0  | 0  | 0  | 0  | 0  | 0  | 0   | 0   | 0   | 0   | 0   |
| B    | B-1 | 19   | 0             | 0  | 0  | 0  | 0  | 0  | 0  | 0   | 0   | 0   | 0   | 0   |
| B    | B-1 | 20   | 0             | 0  | 0  | 0  | 0  | 0  | 0  | 0   | 0   | 0   | 0   | 0   |

|   |     |     |   |   |   |   |   |   |   |   |   |   |   |   |
|---|-----|-----|---|---|---|---|---|---|---|---|---|---|---|---|
| B | B-2 | 21  | 1 | 0 | 0 | 1 | 0 | 0 | 0 | 0 | 0 | 0 | 0 | 0 |
| B | B-2 | 22  | 1 | 0 | 0 | 0 | 0 | 0 | 0 | 0 | 0 | 0 | 0 | 0 |
| B | B-2 | 23  | 1 | 1 | 1 | 0 | 0 | 0 | 0 | 0 | 0 | 0 | 0 | 0 |
| B | B-2 | 24  | 1 | 0 | 0 | 0 | 0 | 0 | 0 | 0 | 0 | 0 | 0 | 0 |
| B | B-2 | 25  | 1 | 1 | 0 | 0 | 0 | 0 | 0 | 0 | 0 | 0 | 0 | 0 |
| B | B-3 | 26  | 1 | 0 | 0 | 0 | 0 | 0 | 0 | 0 | 0 | 0 | 0 | 0 |
| B | B-3 | 27  | 1 | 0 | 1 | 0 | 0 | 0 | 0 | 0 | 0 | 0 | 0 | 0 |
| B | B-3 | 28  | 1 | 0 | 0 | 0 | 0 | 0 | 0 | 0 | 0 | 0 | 0 | 0 |
| B | B-3 | 29  | 1 | 0 | 0 | 0 | 0 | 0 | 0 | 0 | 0 | 0 | 0 | 0 |
| B | B-3 | 30  | 1 | 0 | 0 | 0 | 0 | 0 | 0 | 0 | 0 | 0 | 0 | 0 |
| C | C-1 | 31  | 0 | 1 | 1 | 0 | 0 | 0 | 0 | 0 | 1 | 1 | 1 | / |
| C | C-1 | 32* | 0 | 1 | 1 | 0 | / | / | / | / | / | / | / | / |
| C | C-1 | 33  | 0 | 0 | 1 | 0 | 0 | 0 | 0 | 0 | 1 | 1 | 0 | / |
| C | C-1 | 34  | 0 | 0 | 1 | 0 | 1 | 0 | 0 | 0 | 1 | 0 | 0 | / |
| C | C-2 | 35  | 1 | 1 | 1 | 0 | 1 | 0 | 0 | 0 | 1 | 1 | 1 | / |
| C | C-2 | 36  | 1 | 1 | 1 | 0 | 0 | 0 | 1 | 0 | 1 | 0 | 0 | / |
| C | C-2 | 37  | 1 | 1 | 1 | 0 | 0 | 0 | 0 | 0 | 1 | 1 | 0 | / |
| C | C-2 | 38  | 1 | 1 | 1 | 0 | 0 | 0 | 0 | 1 | 1 | 1 | 1 | / |
| C | C-2 | 39  | 1 | 0 | 1 | 0 | 1 | 0 | 0 | 1 | 1 | 1 | 0 | / |
| C | C-3 | 40  | 1 | 1 | 1 | 1 | 1 | 0 | 0 | 0 | 1 | 1 | 0 | / |
| C | C-3 | 41  | 1 | 0 | 1 | 0 | 0 | 0 | 0 | 0 | 1 | 1 | 0 | / |
| C | C-3 | 42  | 1 | 0 | 1 | 0 | 1 | 0 | 0 | 0 | 1 | 1 | 0 | / |
| C | C-3 | 43  | 1 | 0 | 1 | 0 | 1 | 0 | 0 | 1 | 0 | 1 | 0 | / |
| C | C-3 | 44  | 1 | 0 | 1 | 1 | 1 | 1 | 0 | 1 | 1 | 1 | 0 | / |
| C | C-3 | 45  | 1 | 0 | 1 | 0 | 0 | 0 | 0 | 0 | 1 | 1 | 1 | / |

9 \* Calf #32 died between the 4<sup>th</sup> and the 5<sup>th</sup> sampling days.

10

11

12

13

14

## 15 SM2. Details on the models

16

17 A schematic representation of the model is presented in Figure 1 of the main text. We assumed  
18 the dynamics of ESBL-EC were independent of other *E. coli*. At time  $t$ , each ESBL-EC negative  
19 calf could acquire an ESBL-EC with a probability

$$20 \quad P = 1 - e^{-A(t)}$$

21 where  $A(t)$  was the acquisition rate, which formula depended on the model variant as detailed  
22 in Table S2.  $A(t)$  was generally defined as:

$$23 \quad A(t) = [A_{trans}(t) + A_{spor}(t)] \times \lambda_a(t)$$

24 with, at time  $t$ ,  $A_{trans}(t)$  the acquisition term related to between-calves transmission,  $A_{spor}(t)$  the  
25 term related to sporadic contaminations and  $\lambda_a(t)$  the multiplicative effect related to AMU.

26

27

28 *Transmission model.* Transmission was assumed to occur either homogeneously between calves  
29 of the same farm  $F$ , with rate  $\beta_r^F$ , or between calves depending on their attributed pen,  
30 assuming two transmission rates, within ( $\beta_w^F$ ) and between ( $\beta_b^F$ ) pens of a farm  $F$ . The  
31 transmission rate between individual pens was assumed to be the same as between collective  
32 pens. Transmission was supposed to be proportional to the proportion of calves carrying  
33 ESBL-EC. As a null hypothesis, we also investigated models, which did not include any  
34 transmission between calves, but instead a constant, farm-specific ESBL-EC acquisition rate  
35  $\beta_0^F$ . Therefore, at time  $t$ :

$$36 \quad A_{trans}(t) = \beta_r^F \left(\frac{I}{S+I}\right)_{F, t-1} \text{ for homogeneous mixing (models 1a, 3a, 5a, 1b, 3b and 5b)}$$

$$37 \quad = \beta_w^F \left(\frac{I}{S+I}\right)_{in\ pen, t-1} + \beta_b^F \left(\frac{I}{S+I}\right)_{out\ pen, t-1} \text{ for pen-specific mixing (models 2a, 4a, 6a, 2b, 4b and}$$

38 6b)

$$39 \quad = \beta_0^F \text{ for the baseline acquisition rate (models, 0a, 7a, 8a, 0b, 7b and 8b)}$$

40 where  $I$  was the number of ESBL-EC positive calves in the farm (within the pen, outside the  
41 pen or globally in the farm) and  $S$  the number of ESBL-EC negative calves.

42

43 *Sporadic contamination.* We also assumed that sporadic contamination could occur, depicting  
44 the possible acquisition of ESBL-EC by the calves on farm  $F$  on some specific days from another  
45 (unknown) source other than the colonised calves. To model this process, we assumed that  
46 sporadic contamination events in a given farm increased the acquisition rate  $A(t)$  of all calves  
47 on the farm on the day of contamination by a factor  $\mu$ . We estimated  $N^F$ , the number of days  
48 with contamination events that occurred across the follow up, and  $D^F$ , the specific dates of  
49 contamination. This mechanism was activated in models 0a to 8a.

$$50 \quad \text{We defined: } A_{spor}(t) = \mu \text{ if } t \in D^F \quad (= 0 \text{ otherwise})$$

51

52 *Clearance.* ESBL-EC positive calves could clear carriage with a probability  $1 - e^{-C(t)}$ , where  $C(t)$   
53 was the clearance rate at time  $t$ . In the baseline model, we assumed a natural clearance rate,  $\nu_0$   
54 (inverse of the baseline carriage duration).

55 *Impact of antibiotics.* We modelled the possible effect of AMU through two mechanisms. On the  
 56 one hand, we assumed that AMU could affect the acquisition rate  $A(t)$ . For a given antibiotic  
 57 class  $i$ , this was modelled by a multiplicative factor  $\alpha_{a,i}$ . After the end of exposure, this effect  
 58 was supposed to persist [1], but decrease exponentially [2] with a rate  $\tau$ , common to all  
 59 antibiotic classes, until it reaches a saturation at the value of 1 (see SM7 of this Supplementary  
 60 material for illustration). This mechanism was active for models 3a, 4a, 7a, 3b, 4b and 7b (Table  
 61 1, main text).

62 Therefore, in these models, at time  $t$ ,

$$63 \quad \lambda_a(t) = \prod_i \alpha_{a,i}^{\max(0; 1-\tau E_i(t))} \quad (= 1 \text{ otherwise})$$

64 where  $E_i(t)$  was the number of days since the end of the last exposure of the calf to antibiotic  
 65 class  $i$ . Therefore, if a calf was exposed to antibiotic class  $i$  on day  $t$ ,  $E_i(t)=0$ . During model  
 66 fitting, the antimicrobial exposure considered was only that observed in the longitudinal  
 67 study.

68 On the other hand, we assumed that antibiotics could impact clearance by modulating the  
 69 baseline clearance rate  $v_0$  as follows (activated in models 5a, 6a, 8a, 5b, 6b and 8b):

$$70 \quad C(t) = v_0 \cdot \lambda_c(t) = v_0 \cdot \prod_i \alpha_{c,i}^{\max(0; 1-\tau E_i(t))} \quad (= v_0 \text{ otherwise})$$

71 where  $E_i(t)$  and  $\tau$  were as defined above, and  $\alpha_{c,i}$  was a multiplicative factor analogous to  $\alpha_{a,i}$ ,  
 72 representing the effect of exposure to antibiotic class  $i$  on the clearance rate  $C(t)$ .

73  
 74  
 75  
 76  
 77  
 78  
 79  
 80  
 81  
 82  
 83  
 84  
 85  
 86  
 87  
 88  
 89

90 **Table S2. Expressions of the acquisition rate  $A(t)$  and clearance rate  $C(t)$ , for the considered**  
 91 **models.**

92  $\lambda_a(t) = \prod_i \alpha_{a,i}^{\max(0; 1-\tau E_i(t))}$  and  $\lambda_c(t) = \prod_i \alpha_{c,i}^{\max(0; 1-\tau E_i(t))}$ . Parameter  $\alpha_{a,i}$  (resp.  $\alpha_{c,i}$ ) corresponds  
 93 to the effect of antimicrobial class  $i$  on acquisition (resp. clearance).  $E_i(t)$  is the number of days since the  
 94 end of the last exposure to antibiotic class  $i$ , while  $\tau$  is the rate of the exponential decay of the  
 95 antimicrobial's effect over time, after the end of exposure.  $I$  (resp.  $S$ ) is the number of ESBL-EC positive  
 96 (resp. negative) calves, while  $t$  represents the day and  $F$  is either farm A, B or C.

| Model | Acquisition rate $A(t)$                                                                                                                          | Clearance rate $C(t)$       |
|-------|--------------------------------------------------------------------------------------------------------------------------------------------------|-----------------------------|
| 0a    | $A_{spor}(t) + \beta_0^F$                                                                                                                        | $\nu_0$                     |
| 1a    | $A_{spor}(t) + \beta_f^F \left(\frac{I}{S+I}\right)_{F, t-1}$                                                                                    | $\nu_0$                     |
| 2a    | $A_{spor}(t) + \beta_w^F \left(\frac{I}{S+I}\right)_{in\ pen, t-1} + \beta_b^F \left(\frac{I}{S+I}\right)_{out\ pen, t-1}$                       | $\nu_0$                     |
| 3a    | $[A_{spor}(t) + \beta_f^F \left(\frac{I}{S+I}\right)_{F, t-1}] \times \lambda_a(t)$                                                              | $\nu_0$                     |
| 4a    | $[A_{spor}(t) + \beta_w^F \left(\frac{I}{S+I}\right)_{in\ pen, t-1} + \beta_b^F \left(\frac{I}{S+I}\right)_{out\ pen, t-1}] \times \lambda_a(t)$ | $\nu_0$                     |
| 5a    | $A_{spor}(t) + \beta_f^F \left(\frac{I}{S+I}\right)_{F, t-1}$                                                                                    | $\nu_0 \times \lambda_c(t)$ |
| 6a    | $A_{spor}(t) + \beta_w^F \left(\frac{I}{S+I}\right)_{in\ pen, t-1} + \beta_b^F \left(\frac{I}{S+I}\right)_{out\ pen, t-1}$                       | $\nu_0 \times \lambda_c(t)$ |
| 7a    | $[A_{spor}(t) + \beta_0^F] \times \lambda_a(t)$                                                                                                  | $\nu_0$                     |
| 8a    | $A_{spor}(t) + \beta_0^F$                                                                                                                        | $\nu_0 \times \lambda_c(t)$ |
| 0b    | $\beta_0^F$                                                                                                                                      | $\nu_0$                     |
| 1b    | $\beta_f^F \left(\frac{I}{S+I}\right)_{F, t-1}$                                                                                                  | $\nu_0$                     |
| 2b    | $\beta_w^F \left(\frac{I}{S+I}\right)_{in\ pen, t-1} + \beta_b^F \left(\frac{I}{S+I}\right)_{out\ pen, t-1}$                                     | $\nu_0$                     |
| 3b    | $[\beta_f^F \left(\frac{I}{S+I}\right)_{F, t-1}] \times \lambda_a(t)$                                                                            | $\nu_0$                     |
| 4b    | $[\beta_w^F \left(\frac{I}{S+I}\right)_{in\ pen, t-1} + \beta_b^F \left(\frac{I}{S+I}\right)_{out\ pen, t-1}] \times \lambda_a(t)$               | $\nu_0$                     |
| 5b    | $\beta_f^F \left(\frac{I}{S+I}\right)_{F, t-1}$                                                                                                  | $\nu_0 \times \lambda_c(t)$ |
| 6b    | $\beta_w^F \left(\frac{I}{S+I}\right)_{in\ pen, t-1} + \beta_b^F \left(\frac{I}{S+I}\right)_{out\ pen, t-1}$                                     | $\nu_0 \times \lambda_c(t)$ |
| 7b    | $\beta_0^F \times \lambda_a(t)$                                                                                                                  | $\nu_0$                     |
| 8b    | $\beta_0^F$                                                                                                                                      | $\nu_0 \times \lambda_c(t)$ |

97

98

99

100 **SM3. Code sharing and details on modelling assumptions and on the estimation using**  
101 **MCMC**

102

103 We explored the space of possibilities for acquisition and clearance dates for each individual  
104 using data augmentation [3, 4]. Based on previous estimates of the time to clearance of ESBL-  
105 producing *Enterobacteriales* [5-7], we assumed that, for a given calf, if two consecutive samples  
106 were positive (resp. negative) for ESBL-EC carriage, the calf was ESBL-EC positive (resp.  
107 negative) everyday between the two sampling dates.

108

109 Model parameters were estimated in a Bayesian framework, using a Markov Chain Monte  
110 Carlo (MCMC) algorithm, implemented with the R package *rjags* [8]. For each model variant,  
111 3 chains were run for 6,000 iterations each. Depending on the model variant, from 2,000 to  
112 10,000 values were discarded as burn-in, such that convergence of the Markov chains was  
113 reached. We sampled every 40<sup>th</sup> value because this was enough to avoid autocorrelation within  
114 the Markov chains. The effective sample size was at least 328 for posteriors of each model (953  
115 for model 5a, the model selected). A Gelman-Rubin statistic below 1.1 for all parameters was  
116 considered to indicate that between-chain variance was low enough compared to the within-  
117 chain variance [9]. The exception was model 4 where, if convergence of each chain was  
118 reached, the between-chain variance was still high, no matter the length of the burn-in. Non-  
119 informative uniform priors were used for all parameters (Table 2, main text). The 18 models  
120 were compared using the Deviance Information Criterion (DIC) [10]. The model for which the  
121 DIC was the lowest was selected as the best model (Table S3).

122

123 All analyses of this paper, including models estimation and simulation, were performed using  
124 R version 3.6.1. The code is available on the following link:

125 [https://github.com/JonathanBas/model\\_ESBL\\_calves](https://github.com/JonathanBas/model_ESBL_calves).

126

127

128

129

130

131

132

133

134

135

136

137

138 **SM4. Antimicrobial use observed in farms**

139

140 In our study, no individual treatment was observed: antibiotics were always administered to  
141 all calves on each farm simultaneously.

142 On farm A, five treatments were observed: colistin and sulfonamides between days 1 and 10,  
143 tetracycline between days 11 and 20, doxycycline on day 53, and amoxicillin on day 136 (Figure  
144 2, main text). On farm B, calves were treated with doxycycline and erythromycin on day 26,  
145 tetracycline on day 90, and amoxicillin on day 101, resulting in four one-day treatments. On  
146 farm C, calves were exposed to five treatments: sulfonamide-trimethoprim combination  
147 between days 3 and 8, followed by tetracycline between days 10 and 16, doxycycline between  
148 days 20 and 24, spiramycin between days 25 and 27, and tetracycline between days 80 and 82.

149

150

151

152

153

154

155

156

157

158

159

160

161

162

163

164

165

166

167

168

169

170

171

172 **SM5. DIC of models**

173

174 *Table S3. Deviance Information Criterion (DIC) of models. Model 5a presented the lowest DIC.*

|              |           |           |           |           |           |           |           |           |           |
|--------------|-----------|-----------|-----------|-----------|-----------|-----------|-----------|-----------|-----------|
| <b>Model</b> | <b>0a</b> | <b>1a</b> | <b>2a</b> | <b>3a</b> | <b>4a</b> | <b>5a</b> | <b>6a</b> | <b>7a</b> | <b>8a</b> |
| <b>DIC</b>   | 223.6     | 217.7     | 225.5     | 224.0     | 246.2     | 196.3     | 212.0     | 230.3     | 201.9     |
| <b>Model</b> | <b>0b</b> | <b>1b</b> | <b>2b</b> | <b>3b</b> | <b>4b</b> | <b>5b</b> | <b>6b</b> | <b>7b</b> | <b>8b</b> |
| <b>DIC</b>   | 256.1     | 238.5     | 248.0     | 236.6     | 250.9     | 219.1     | 232.6     | 251.6     | 239.2     |

175

176

177

178

179

180

181

182

183

184

185

186

187

188

189

190

191

192

193

194

195



196 **SM6. Posterior distributions in model 5a**

197

198

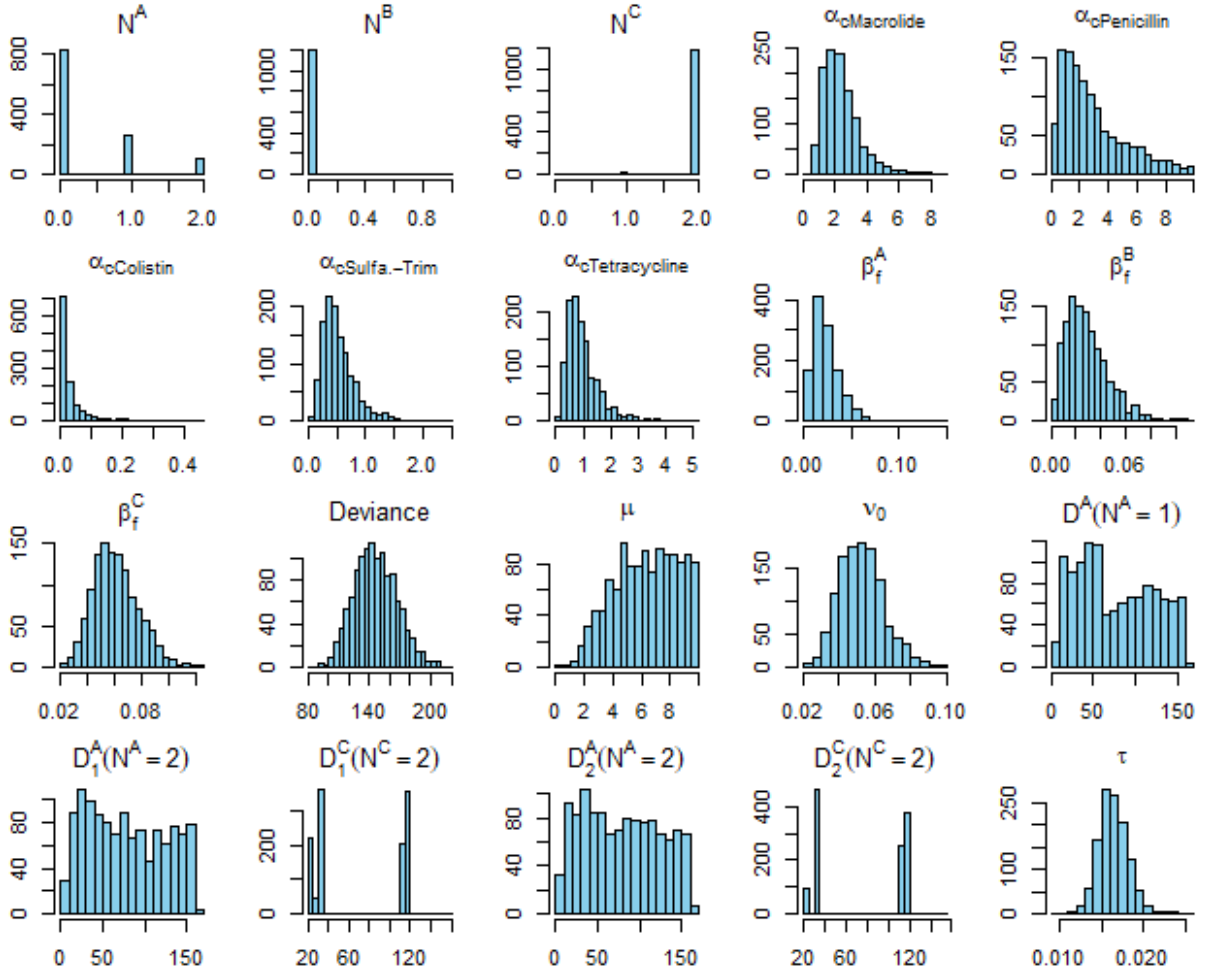

199

200 **Figure S1. Posterior distributions for the best model, model 5a.** Parameters (and their prior  
 201 distributions) are defined in Table 2 of the main text.  $D^F(N^F=1)$  is the date of occurrence of the sporadic  
 202 contamination event in farm F when  $N^F$  (number of sporadic contamination events in farm F) is  
 203 estimated to be 1.  $D_1^F(N^F=2)$  and  $D_2^F(N^F=2)$  are the dates of the two sporadic contamination events in  
 204 farm F when  $N^F$  is estimated to be 2. The posterior distributions of the dates of sporadic contamination  
 205 events in farm A, i.e.  $D^A(N^A=1)$ ,  $D_1^A(N^A=2)$  and  $D_2^A(N^A=2)$ , were close to their prior distributions,  
 206 because a majority (69.3%) of  $N^A$  posterior samples were 0 (see Table 3 of the main text). Therefore,  
 207 these dates parameters were hardly affected by the data. Similarly, the posterior distributions of  
 208  $D^B(N^B=1)$ ,  $D_1^B(N^B=2)$ ,  $D_2^B(N^B=2)$  corresponded to their prior distributions and were not displayed. On  
 209 the contrary, these dates were clearly estimated around days 22, 35, 114 and 117 for farm C.

210

211

212

213

214 SM7. Evolution of the clearance rate  $C(t)$  after the end of colistin use

215

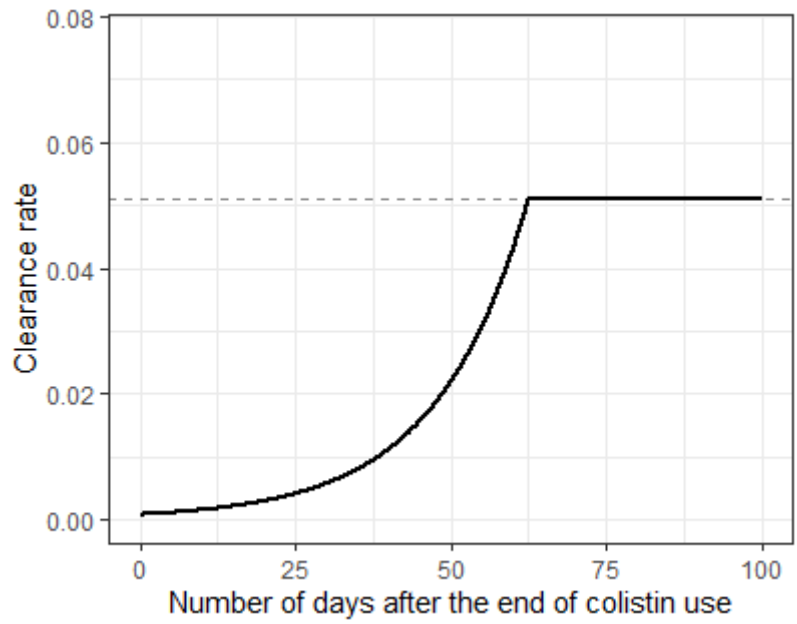

216

217 **Figure S2.** Evolution of the clearance rate after the end of colistin use (solid line), using median  
218 estimated values of parameters in Model 5a (Table 3, main text). After a delay, the clearance rate  $C(t)$   
219 equals  $v_0$  (dashed line).

220

221

222

223

224

225

226

227

228

229

230

231

232

233

234

235

236 SM8. Separate fits of each farm using model 5a

237

238

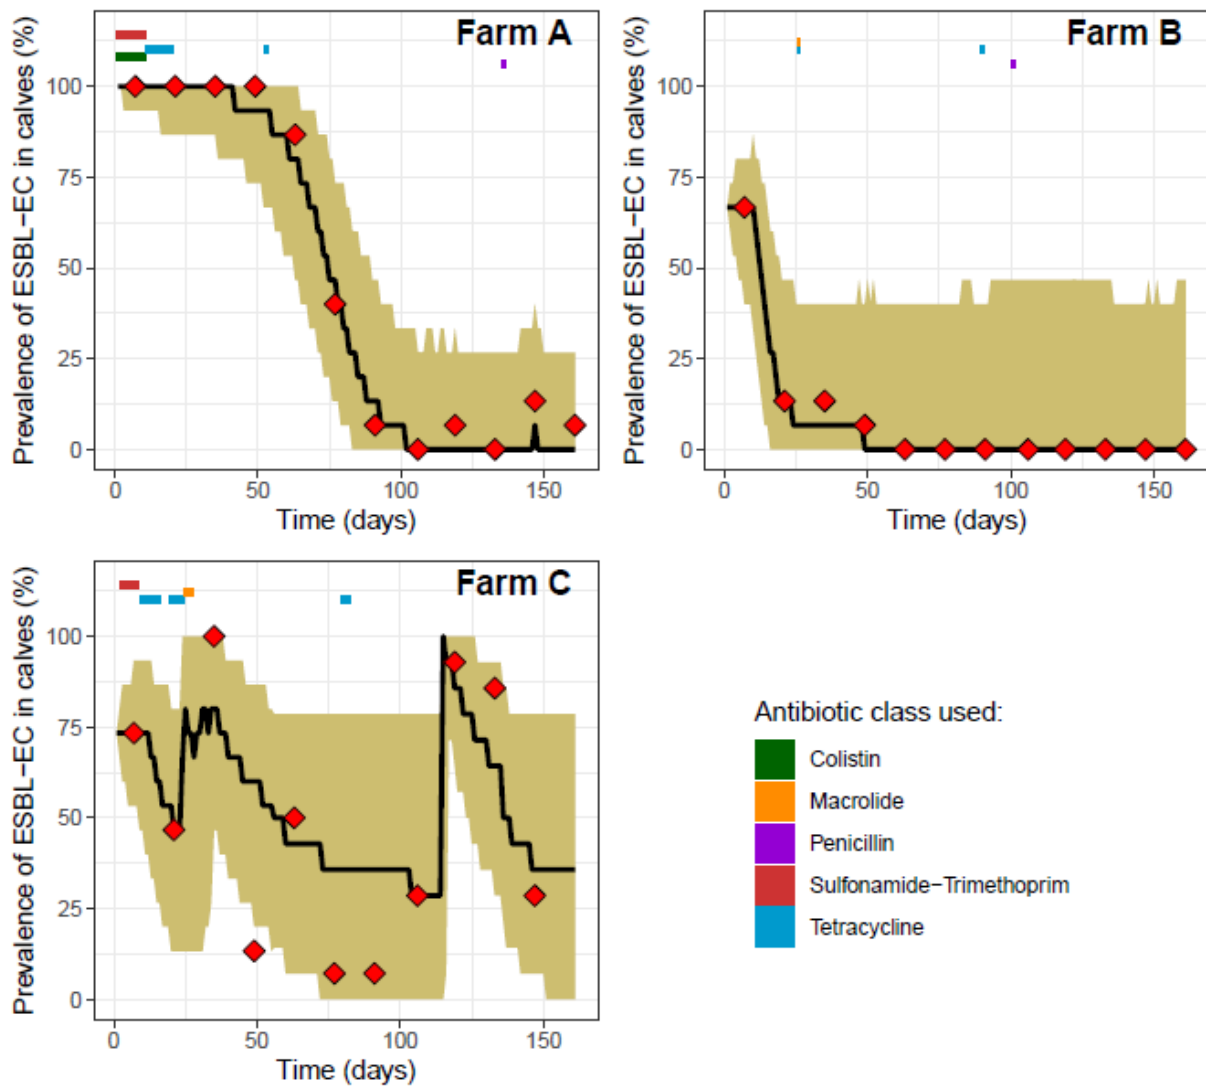

239

240 *Figure S3. Observed (red dots), median predicted ESBL-EC prevalence (black line) and 95% prediction*  
241 *interval using model 5a for each farm separately (5,000 repetitions of the model). Observed periods of*  
242 *antimicrobial use are represented for each antibiotic class.*

243

244

245

246

247

248

249

250 **SM9. Sensitivity analysis on the farm selected for the simulations study**

251

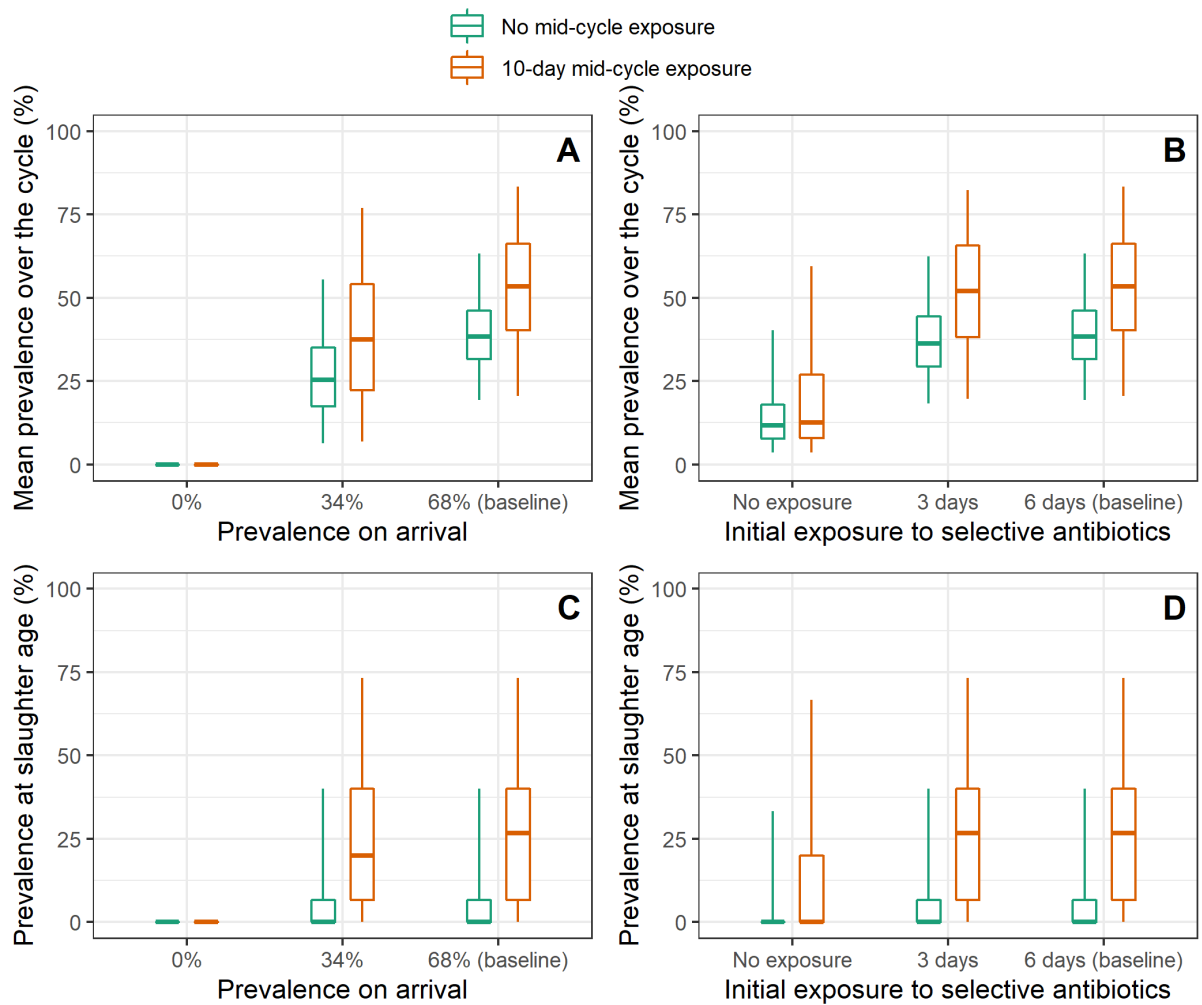

252

253 **Figure S4. Simulations of ESBL-EC mitigation strategies in farm B.** Mean ESBL-EC prevalence  
 254 over the production cycle (panels A and B) and prevalence at slaughter age (panels C and D) predicted  
 255 in farm B by model 5a (5,000 repetitions of the model), when ESBL-EC prevalence on arrival (panels A  
 256 and C) and the duration of the initial antibiotic exposure (panels B and D) are changed from their  
 257 baseline values. Scenarios without (turquoise) or with (orange) a 10-day antibiotic exposure in the  
 258 middle of the fattening cycle (between days 81 and 90) are explored. Values represented by the boxes are  
 259 the predicted median, and the 50% and 95% prediction intervals.

260

261

262

263

264

265

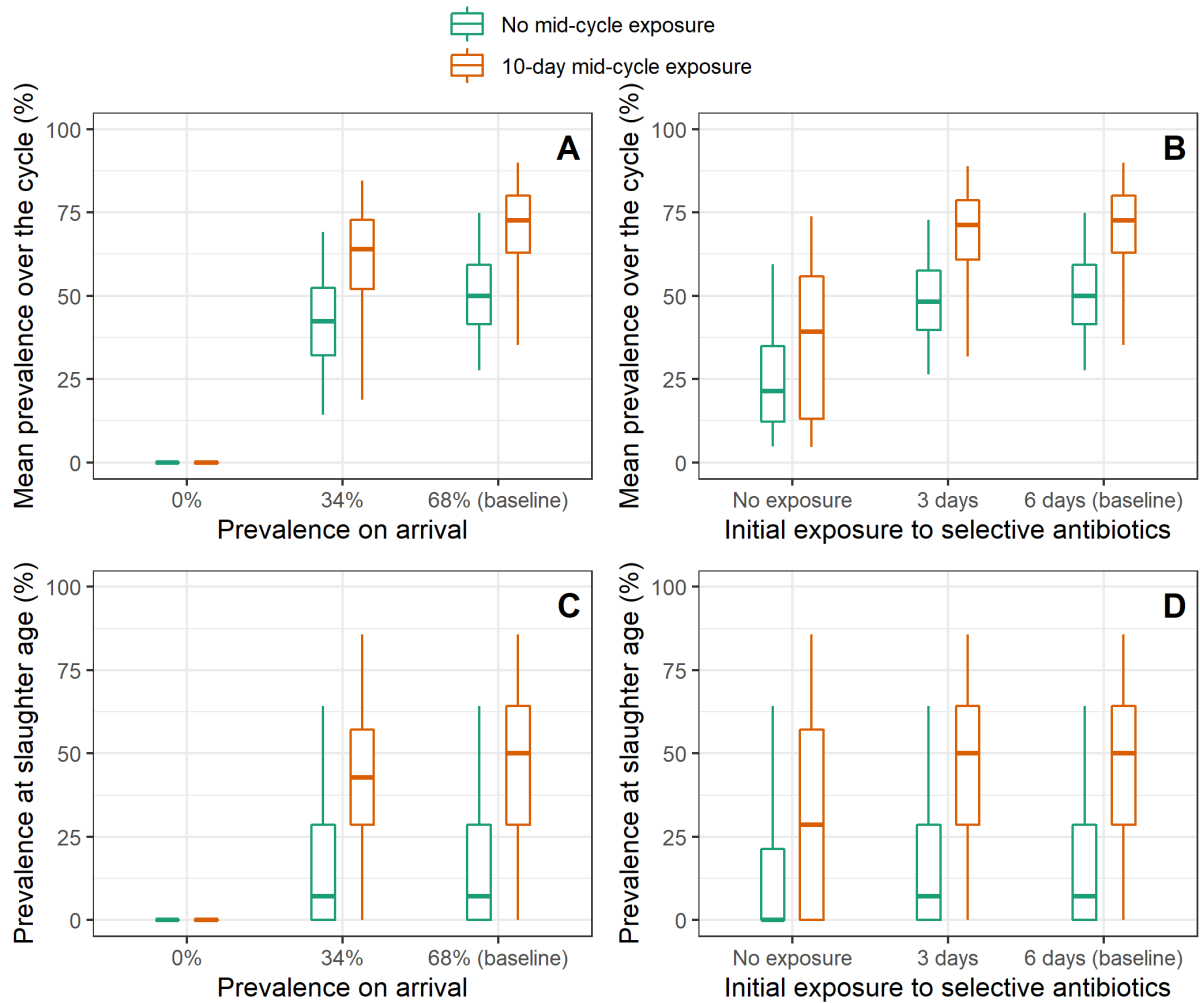

266

267 **Figure S5. Simulations of ESBL-EC mitigation strategies in farm C.** Mean ESBL-EC prevalence  
 268 over the production cycle (panels A and B) and prevalence at slaughter age (panels C and D) predicted  
 269 in farm C by model 5a (5,000 repetitions of the model), when ESBL-EC prevalence on arrival (panels A  
 270 and C) and the duration of the initial antibiotic exposure (panels B and D) are changed from their  
 271 baseline values. Scenarios without (turquoise) or with (orange) a 10-day antibiotic exposure in the  
 272 middle of the fattening cycle (between days 81 and 90) are explored. Values represented by the boxes are  
 273 the predicted median, and the 50% and 95% prediction intervals.

274

275

276

277

278

279

280

281

## 282 **References of the Supplementary material**

283

- 284 [1] S. Caballero, S. Kim, R.A. Carter, I.M. Leiner, B. Sušac, L. Miller, et al. Cooperating  
285 Commensals Restore Colonization Resistance to Vancomycin-Resistant *Enterococcus faecium*.  
286 *Cell Host Microbe*. 2017;21(5):592-602.e4.
- 287 [2] E.N. Abatih, L. Alban, A.K. Ersbøll, D.M. Lo Fo Wong. Impact of antimicrobial usage on  
288 the transmission dynamics of antimicrobial resistant bacteria among pigs. *Journal of*  
289 *Theoretical Biology*. 2009;256(4):561-73.
- 290 [3] S. Cauchemez, L. Temime, A.-J. Valleron, E. Varon, G. Thomas, D. Guillemot, et al. S.  
291 pneumoniae transmission according to inclusion in conjugate vaccines: Bayesian analysis of a  
292 longitudinal follow-up in schools. *BMC Infect Dis*. 2006;6:14-.
- 293 [4] B.S. Cooper, G.F. Medley, S.J. Bradley, G.M. Scott. An Augmented Data Method for the  
294 Analysis of Nosocomial Infection Data. *American Journal of Epidemiology*. 2008;168(5):548-  
295 57.
- 296 [5] M.S. Arcilla, J.M. van Hattem, M.R. Haverkate, M.C.J. Bootsma, P.J.J. van Genderen, A.  
297 Goorhuis, et al. Import and spread of extended-spectrum beta-lactamase-producing  
298 Enterobacteriaceae by international travellers (COMBAT study): a prospective, multicentre  
299 cohort study. *The Lancet Infectious Diseases*. 2017;17(1):78-85.
- 300 [6] G. Birgand, L. Armand-Lefevre, I. Lolom, E. Ruppe, A. Andreumont, J.-C. Lucet. Duration  
301 of colonization by extended-spectrum beta-lactamase-producing Enterobacteriaceae after  
302 hospital discharge. *Am J Infect Control*. 2013;41(5):443-7.
- 303 [7] S.B. Jørgensen, A. Søråas, A. Sundsfjord, K. Liestøl, T.M. Leegaard, P.A. Jenum. Fecal  
304 carriage of extended spectrum  $\beta$ -lactamase producing *Escherichia coli* and *Klebsiella*  
305 pneumoniae after urinary tract infection - A three year prospective cohort study. *PLOS ONE*.  
306 2017;12(3):e0173510-e.
- 307 [8] M. Plummer, A. Stukalov, M. Denwood, M.M. Plummer. Package 'rjags'. 2018.
- 308 [9] S.P. Brooks, A. Gelman. General Methods for Monitoring Convergence of Iterative  
309 Simulations. *Journal of Computational and Graphical Statistics*. 1998;7(4):434-55.
- 310 [10] D.J. Spiegelhalter, N.G. Best, B.P. Carlin, A.J.J.o.t.R.S.S.S.B. Van Der Linde. Bayesian  
311 measures of model complexity and fit. 2002;64(4):583-639.

312
